# Supplementary material for: Synthesis and Characterization of New Biodegradable Injectable Thermosensitive Smart Hydrogels for 5-Fluorouracil Delivery
Source: MDPI journal article supplement (doi:10.3390/ijms22158330), 2021-08-03
Supplement: s1 [file s1]

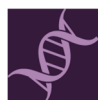

Supplementary Materials

**Table S1.** Cytotoxicity assay of the PCEC copolymers (for the highest concentrations tested (1 mg/mL)).

| Sample           | Cells survival $\pm$ SD [%] |
|------------------|-----------------------------|
| PCEC-A1.7        | 96 $\pm$ 1                  |
| PCEC-A2.0        | 98 $\pm$ 4                  |
| Positive control | 0 $\pm$ 0                   |
| Negative control | 103 $\pm$ 7                 |

**Table S2.** Genotoxicity assay of PCEC-A1.7 and PCEC-A2.0 samples (performed at the highest concentration (1 mg/mL), with and without metabolic activation).

| Sample           | -S9 <sup>1</sup> |                 | +S9 <sup>2</sup> |                 |
|------------------|------------------|-----------------|------------------|-----------------|
|                  | G $\pm$ SD       | IR $\pm$ SD     | G $\pm$ SD       | IR $\pm$ SD     |
| PCEC-A1.7        | 1.03 $\pm$ 0.16  | 0.92 $\pm$ 0.08 | 1.07 $\pm$ 0.17  | 0.86 $\pm$ 0.17 |
| PCEC-A2.0        | 0.98 $\pm$ 0.18  | 0.98 $\pm$ 0.18 | 1.05 $\pm$ 0.09  | 0.91 $\pm$ 0.20 |
| Solvent control  | 0.95 $\pm$ 0.06  | 1.00 $\pm$ 0.01 | 1.02 $\pm$ 0.05  | 0.95 $\pm$ 0.00 |
| Positive control | 0.94 $\pm$ 0.00  | 2.31 $\pm$ 0.10 | 0.93 $\pm$ 0.05  | 1.59 $\pm$ 0.01 |
| Negative control | 1.00 $\pm$ 0.03  | 1.00 $\pm$ 0.07 | 1.00 $\pm$ 0.05  | 1.00 $\pm$ 0.08 |

<sup>1</sup> without metabolic activation, <sup>2</sup> with metabolic activation

**Table S3.** HPLC gradient for 5-fluorouracil analysis.

| Time<br>[min] | Phase A [%]<br>(H <sub>2</sub> O + 0.1 % TFA) | Phase B [%]<br>(ACN + 0.1 % TFA) |
|---------------|-----------------------------------------------|----------------------------------|
| 0             | 99                                            | 1                                |
| 7             | 96                                            | 4                                |
| 12            | 20                                            | 80                               |
| 22            | 20                                            | 80                               |
| 27            | 99                                            | 1                                |
| 33            | 99                                            | 1                                |
